# Supplementary material for: Designable microfluidic ladder networks from backstepping microflow analysis for mass production of monodisperse microdroplets
Source: Royal Society of Chemistry journal article supplement (doi:10.1039/d2lc00771a), 2022-01-01
Supplement: d2lc00771a1.pdf [file d2lc00771a1.pdf]

## Electronic Supplementary Information

### Designable microfluidic ladder networks from backstepping microflow analysis for mass production of monodisperse microdroplets

Chuan-Fu Deng,<sup>a</sup> Yao-Yao Su,<sup>a</sup> Shi-Hao Yang,<sup>a</sup> Qing-Rong Jiang,<sup>a</sup> Rui Xie,<sup>ab</sup> Xiao-Jie Ju,<sup>ab</sup>

Zhuang Liu,<sup>ab</sup> Da-Wei Pan,<sup>ab</sup> Wei Wang,<sup>\*ab</sup> and Liang-Yin Chu<sup>\*ab</sup>

<sup>a</sup> School of Chemical Engineering, Sichuan University, Chengdu, Sichuan 610065, China.

<sup>b</sup> State Key Laboratory of Polymer Materials Engineering, Sichuan University, Chengdu,

Sichuan 610065, China.

**Note S1: Calculation of microchannel dimensions in microfluidic ladder networks for single-phase flow simulation**

*Step 1: K value*

Calculate the  $K$  value for the microfluidic ladder networks from the corresponding rule shown in **Table 1**.

*Step 2: Relationship between  $K$  and microchannel dimensions*

The  $K$  is the flow resistance ratio of  $R_B/R_D$ . Based on Eq. (1), the relationship between the  $K$  and microchannel dimensions can be expressed as Eq. (S1):

$$K = R_B/R_D = [(w_B + h_B)^2 l_B / (w_B^3 h_B^3)] / [(w_D + h_D)^2 l_D / (w_D^3 h_D^3)] \quad (S1)$$

*Step 3: Calculation of microchannel dimensions*

For the six microchannel sizes in Eq. (S1), five of them can be flexibly determined in a reasonable micrometer range, and then the rest one can be calculated based on the values of the five microchannel sizes and the  $K$  using Eq. (S1). The flexible choices of the five microchannel sizes are usually limited by the desired droplet sizes, and the microchannel manufacturing techniques. Here we fixed the  $w_D, h_D, l_D$  of distribution microchannel, and the  $w_B, h_B$  of branch microchannel, and then calculated the  $l_B$  of branch microchannel using Eq. (S1). The microchannel sizes of all microfluidic ladder networks for the simulation were listed in **Table S1**.

## Note S2: Calculation of microchannel dimensions in microfluidic integrated devices

### *Step 1: K value*

Calculate the  $K$  value for the microfluidic ladder networks from the corresponding rule shown in **Table 1**.

### *Step 2: Relationship between K and microchannel dimensions*

The  $K$  is the flow resistance ratio of  $R_B/R_D$ . For the microfluidic integrated device with ladder networks containing wedge-type droplet generators, the flow resistance of branch microchannel ( $R_B$ ) is the sum the flow resistances of the rectangular segment ( $R_{B1}$ ) and the wedge segment ( $R_{B2}$ ). Thus, the  $K$  can be expressed as Eq. (S2):

$$K = (R_{B1} + R_{B2})/R_D \quad (S2)$$

$R_{B2}$  is equivalent to the flow resistance of a rectangular microchannel with height ( $h_B$ ) and length ( $l_{B2}$ ) same as that of the wedge segment, but with width same as that of the middle part of the wedge segment ( $w_{Bm}$ ). Thus, based on Eq. (1), the relationship between  $K$  and microchannel sizes can be expressed as Eq. (S3):

$$K = \frac{[(w_B + h_B)l_{B1}/(w_B h_B) + (w_{Bm} + h_B)l_{B2}/(w_{Bm} h_B)]}{(w_D + h_D)} \quad (S3)$$

### *Step 3: Calculation of microchannel dimensions*

Similarly as mentioned in **Note S1**, for the eight microchannel sizes in Eq. (S3), seven of them can be flexibly determined in a reasonable micrometer range, and then the rest one can be calculated based on the values of the seven microchannel sizes and the  $K$  using Eq. (S3). The flexible choices of the seven microchannel sizes are usually limited by the desired droplet sizes,

and the microchannel manufacturing techniques. Here we fixed  $w_D$ ,  $h_D$  and  $l_D$  of the distribution microchannel,  $w_B$ ,  $w_{Bm}$ ,  $h_B$  and  $l_{B2}$  of branch microchannel, and then calculated the  $l_{B1}$  of the branch microchannel using Eq. (S3). Moreover, for the device designed by the existed rule, its two distribution microchannels show different widths ( $W_{Din} \neq W_{Dout}$ ), thus we use the average value of segment flow resistances in the two distribution microchannels as the segment flow resistance  $R_D$ . The microchannel sizes of two microfluidic integrated devices were listed in **Table S2**.

**Note S3: Calculation of resistance loss of path  $i$  in microfluidic ladder networks**

For the microfluidic ladder network with  $N$  branch microchannels in counter-flow operation, The  $h_{f,i}$  of flow path- $i$  usually includes the resistance loss of inlet distribution microchannel ( $h_{f,i-Din}$ ), branch microchannel ( $h_{f,i-B}$ ) and inlet distribution microchannel ( $h_{f,i-Dout}$ ), which is indicated by the blue line in Fig. S1a. The  $h_{f,i-Din}$ ,  $h_{f,i-B}$  and  $h_{f,i-Dout}$  can be respectively expressed by Eq. (S4), Eq. (S5) and Eq. (S6) under the assumption of uniform flow distribution.

$$h_{f,i-Din} = [(N-1)Qa + (N-2)Qa + \dots + (N-i + 1)Qa]RD \quad (S4)$$

$$h_{f,i-B} = QaRB \quad (S5)$$

$$h_{f,i-Dout} = [(N-i + 1)Qa + (N-i + 2)Qa + \dots + (N-1)Qa]RD \quad (S6)$$

The  $h_{f,i}$  of flow path- $i$  is the sum of  $h_{f,i-Din}$ ,  $h_{f,i-B}$  and  $h_{f,i-Dout}$ , and can be expressed as Eq. (S7) (namely the Eq. (6)):

$$h_{f,i} = [-i2 + (2N + 1)i - 2N]QaRD + QaRB \quad (S7)$$

Similarly, for the microfluidic ladder network with  $N$  branch microchannels in co-flow operation, the  $h_{f,i}$  of flow path- $i$  usually includes the resistance loss of inlet distribution microchannel ( $h_{f,i-Din}$ ), branch microchannel ( $h_{f,i-B}$ ) and inlet distribution microchannel ( $h_{f,i-Dout}$ ), which is indicated by the blue line in Fig. S1b. The  $h_{f,i-Din}$ ,  $h_{f,i-B}$  and  $h_{f,i-Dout}$  can be respectively expressed by Eq. (S8), Eq. (S9) and Eq. (S10) under the assumption of uniform flow distribution.

$$h_{f,i-Din} = [(N-1)Qa + (N-2)Qa + \dots + (N-i + 1)Qa]RD \quad (S8)$$

$$h_{f,i-B} = QaRB \quad (S9)$$

$$h_{f,i-Dout} = [iQa + (i + 1)Qa + \dots + (N-1)Qa]RD \quad (S10)$$

The  $h_{f,i}$  of flow path- $i$  is the sum of  $h_{f,i-Din}$ ,  $h_{f,i-B}$  and  $h_{f,i-Dout}$ , and can be expressed as Eq. (S11) (namely the Eq. (12) in the main text):

$$h_{f,i} = Q_a[-i2(N+1)i + 0.5N2 - 1.5N]RD + Q_aRB \quad (\text{S11})$$

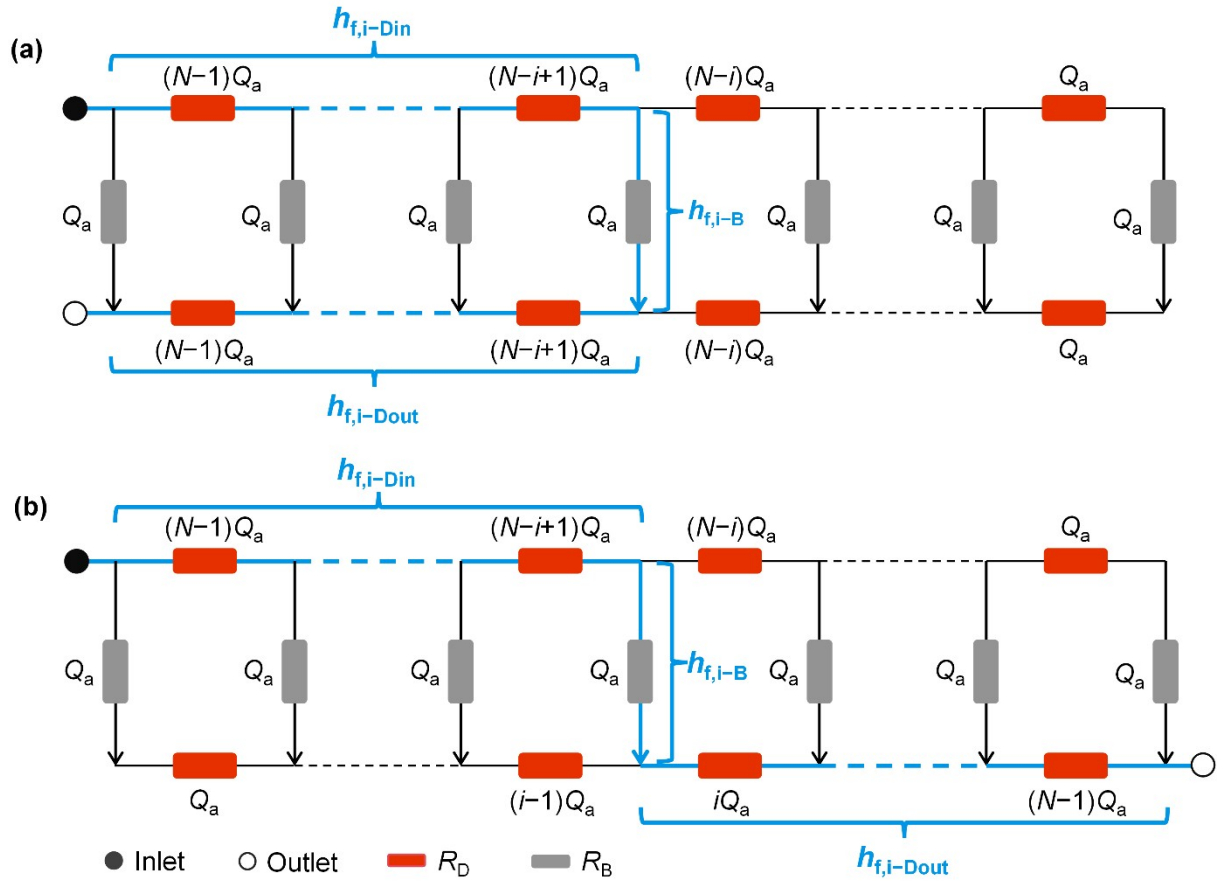

**Figure S1.** Schematic illustration of flow path- $i$  for the microfluidic ladder network with  $N$  branch microchannels in counter-flow operation (a) and co-flow operation (b).

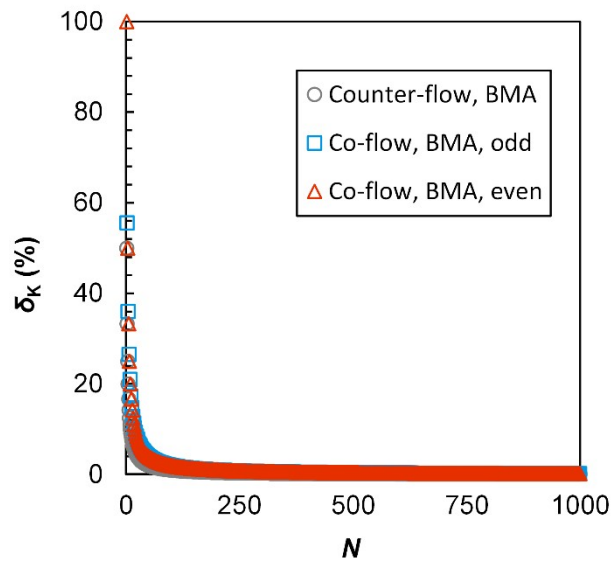

**Figure S2.** Relative deviation ( $\delta_K$ ) of  $K$  value after approximation in the equation of BMA rule.  $\delta_K$  is defined as the ratio of  $(K-K_R)$  to  $K$ , where  $K$  and  $K_R$  are respectively calculated by the equation of BMA rule with and without the approximation.

**Table S1.** Designed parameters of microfluidic ladder networks for numerical simulation

| Rule                  | $N$<br>(-) | $K_{\min}$<br>(-) | $w_B$<br>( $\mu\text{m}$ ) | $h_B$<br>( $\mu\text{m}$ ) | $l_B$<br>( $\mu\text{m}$ ) | $w_D$<br>( $\mu\text{m}$ ) | $h_D$<br>( $\mu\text{m}$ ) | $l_D$<br>( $\mu\text{m}$ ) |
|-----------------------|------------|-------------------|----------------------------|----------------------------|----------------------------|----------------------------|----------------------------|----------------------------|
| Counter-flow, existed | 20         | 4000              | 100                        | 40                         | 1500                       | 3000                       | 400                        | 17167                      |
|                       | 80         | 16000             | 100                        | 40                         | 1500                       | 3000                       | 400                        | 4292                       |
|                       | 100        | 20000             | 100                        | 40                         | 1500                       | 3000                       | 400                        | 3433                       |
|                       | 150        | 30000             | 100                        | 40                         | 1500                       | 3000                       | 400                        | 2289                       |
|                       | 200        | 40000             | 100                        | 40                         | 1500                       | 3000                       | 400                        | 1717                       |
| Counter-flow, BMA     | 20         | 40000             | 100                        | 40                         | 18000                      | 3000                       | 400                        | 20600                      |
|                       | 80         | 640000            | 100                        | 40                         | 18000                      | 3000                       | 400                        | 1288                       |
|                       | 100        | 1000000           | 100                        | 40                         | 18000                      | 3000                       | 400                        | 824                        |
|                       | 150        | 2250000           | 100                        | 40                         | 18000                      | 3000                       | 400                        | 366                        |
|                       | 200        | 4000000           | 100                        | 40                         | 18000                      | 3000                       | 400                        | 206                        |
| Co-flow, BMA          | 20         | 10000             | 100                        | 40                         | 5000                       | 3000                       | 400                        | 22889                      |
|                       | 80         | 160000            | 100                        | 40                         | 5000                       | 3000                       | 400                        | 1431                       |
|                       | 100        | 250000            | 100                        | 40                         | 5000                       | 3000                       | 400                        | 916                        |
|                       | 150        | 562500            | 100                        | 40                         | 5000                       | 3000                       | 400                        | 407                        |
|                       | 200        | 1000000           | 100                        | 40                         | 5000                       | 3000                       | 400                        | 229                        |



**Table S2.** Microchannel size of microfluidic integrated devices

| Device               | $w_B$<br>( $\mu\text{m}$ ) | $h_B$<br>( $\mu\text{m}$ ) | $l_{B1}$<br>( $\mu\text{m}$ ) | $l_{B2}$<br>( $\mu\text{m}$ ) | $w_{Din}$<br>( $\mu\text{m}$ ) | $w_{Dout}$<br>( $\mu\text{m}$ ) | $h_D$<br>( $\mu\text{m}$ ) | $l_D$<br>( $\mu\text{m}$ ) |
|----------------------|----------------------------|----------------------------|-------------------------------|-------------------------------|--------------------------------|---------------------------------|----------------------------|----------------------------|
| E-200 (designed)     | 80                         | 40                         | 932                           | 450                           | 1800                           | 4000                            | 240                        | 320                        |
| E-200 (experimental) | 80.07                      | 39.77                      | 798.17                        | 421.41                        | 1619.57                        | 3619.57                         | 264.80                     | 306.27                     |
| B-200 (designed)     | 80                         | 40                         | 14534                         | 450                           | 4000                           | 4000                            | 240                        | 320                        |
| B-200 (experimental) | 82.66                      | 37.92                      | 12956.29                      | 417.34                        | 3600.99                        | 3600.99                         | 265.68                     | 309.22                     |

**Table S3.** Designed parameters of microfluidic ladder networks with different deviation parameters

| Device | Deviation parameter | $K$    | $w_B$ ( $\mu\text{m}$ ) | $h_B$ ( $\mu\text{m}$ ) | $l_B$ ( $\mu\text{m}$ ) | $w_D$ ( $\mu\text{m}$ ) | $h_D$ ( $\mu\text{m}$ ) | $l_D$ ( $\mu\text{m}$ ) |
|--------|---------------------|--------|-------------------------|-------------------------|-------------------------|-------------------------|-------------------------|-------------------------|
| 1      | 0.01                | $10^6$ | 80                      | 40                      | 14800                   | 4000                    | 240                     | 320                     |
| 2      | 0.001               | $10^7$ | 80                      | 40                      | 20000                   | 6500                    | 400                     | 320                     |
| 3      | 0.0001              | $10^8$ | 80                      | 40                      | 30000                   | 10000                   | 650                     | 320                     |
